# Supplementary material for: Stigmasterol Exerts an Anti-Melanoma Property through Down-Regulation of Reactive Oxygen Species and Programmed Cell Death Ligand 1 in Melanoma Cells
Source: MDPI journal article supplement (doi:10.3390/antiox13030380), 2024-03-21
Supplement: s1 [file s1]

## Stigmasterol Exerts an Anti-Melanoma Property through Down-Regulation of ROS and PD-L1 in Melanoma Cells

Na-Ra Han <sup>1,2</sup>, Tae-Hoo Yi <sup>3</sup>, Hi-Joon Park <sup>4</sup>, Seong-Gyu Ko <sup>2,5</sup> and Phil-Dong Moon <sup>6,\*</sup>

### Supplementary Figures

**Figure S1.** The impact of STIG on melanin content in melan-a cells

**Figure S2.** The impact of STIG on the cell viability of A375 cells

**Figure S3.** The impact of the co-incubation with STIG, nutlin-3a, or rapamycin on cell cycle arrest

**Figure S4.** The impact of STIG on PD-L1 mRNA levels in A375 cells

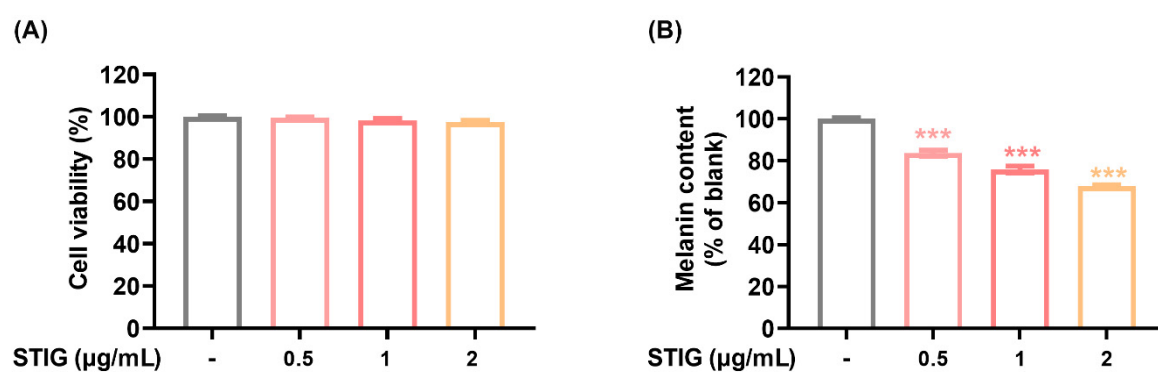

**Figure S1.** The impact of STIG on melanin content in melan-a cells. **(A)** Cell viability was assessed for melan-a cells following exposure to various doses of STIG for 48 h. **(B)** The relative melanin levels were determined at 405 nm. \*\*\* $p < 0.001$ , compared with the untreated group (blank).

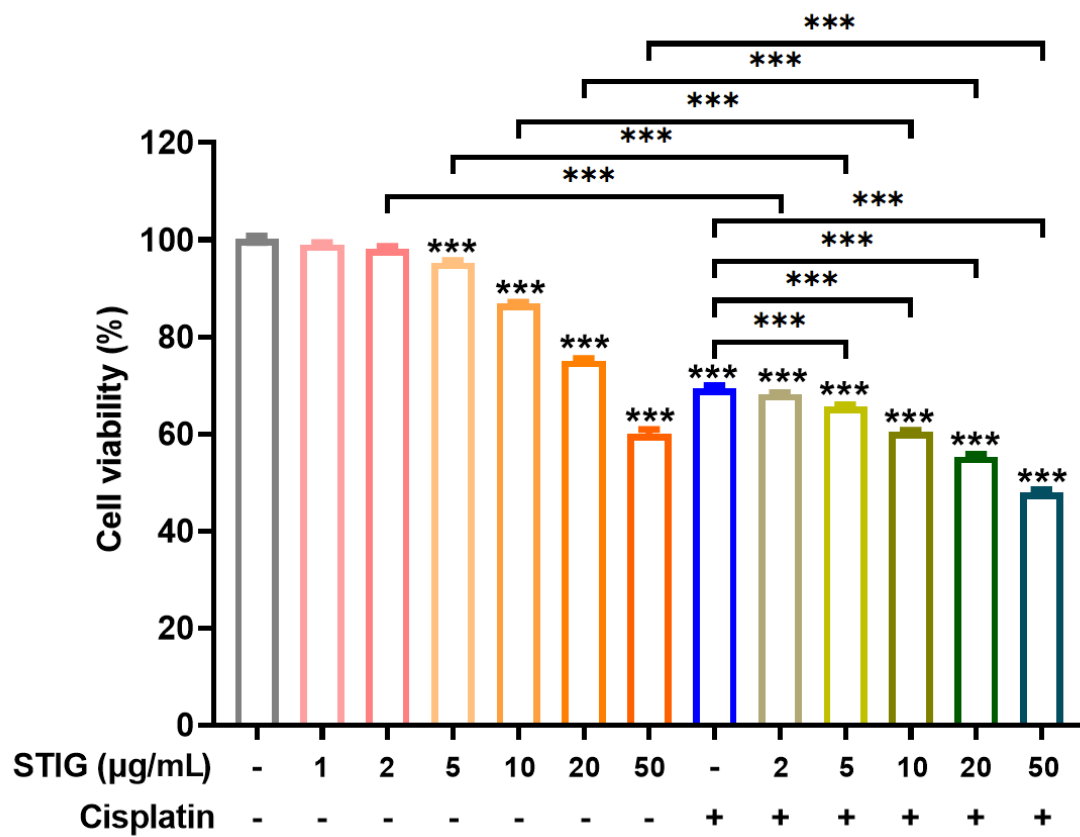

**Figure S2.** The impact of STIG on the cell viability of A375 cells. Cell viability was assessed for A375 cells following exposure to various dose of STIG and cisplatin for 48 h. \*\*\* $p < 0.001$ , compared with the untreated group (blank).

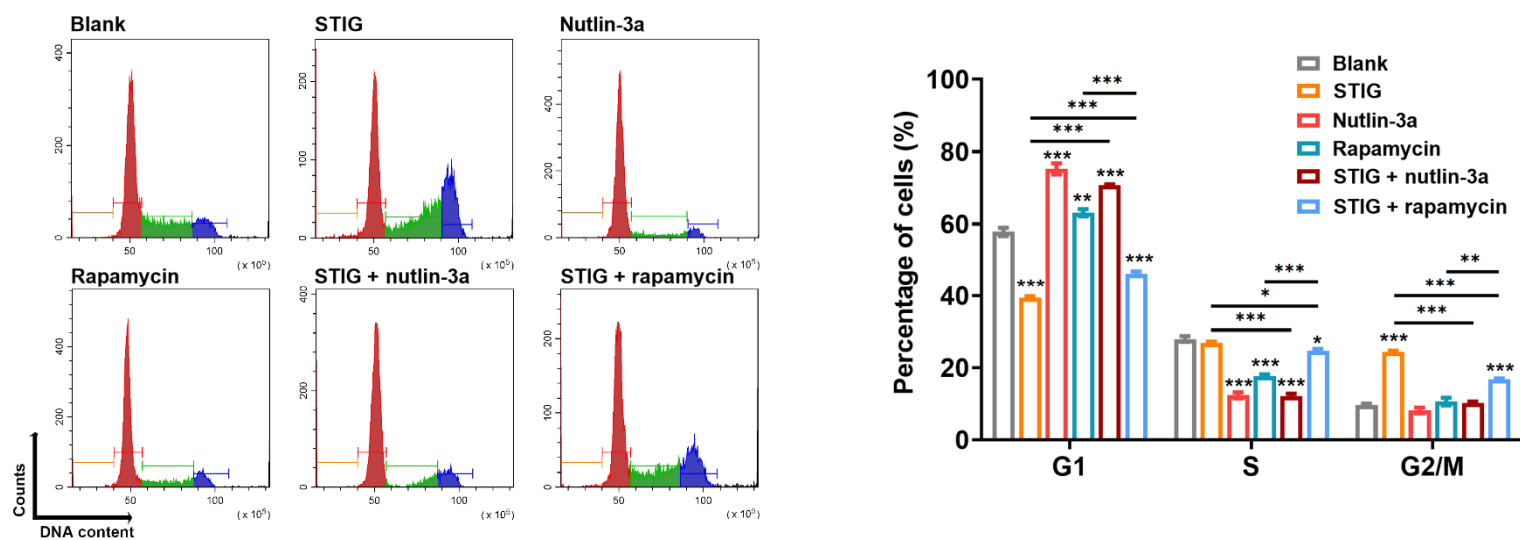

**Figure S3.** The impact of the co-incubation with STIG, nutlin-3a, or rapamycin on cell cycle arrest. Cell cycle arrest was measured using flow cytometry. Summary data appears on the right. \* $p < 0.05$ , \*\* $p < 0.01$ , and \*\*\* $p < 0.001$ , compared with the untreated group (blank).

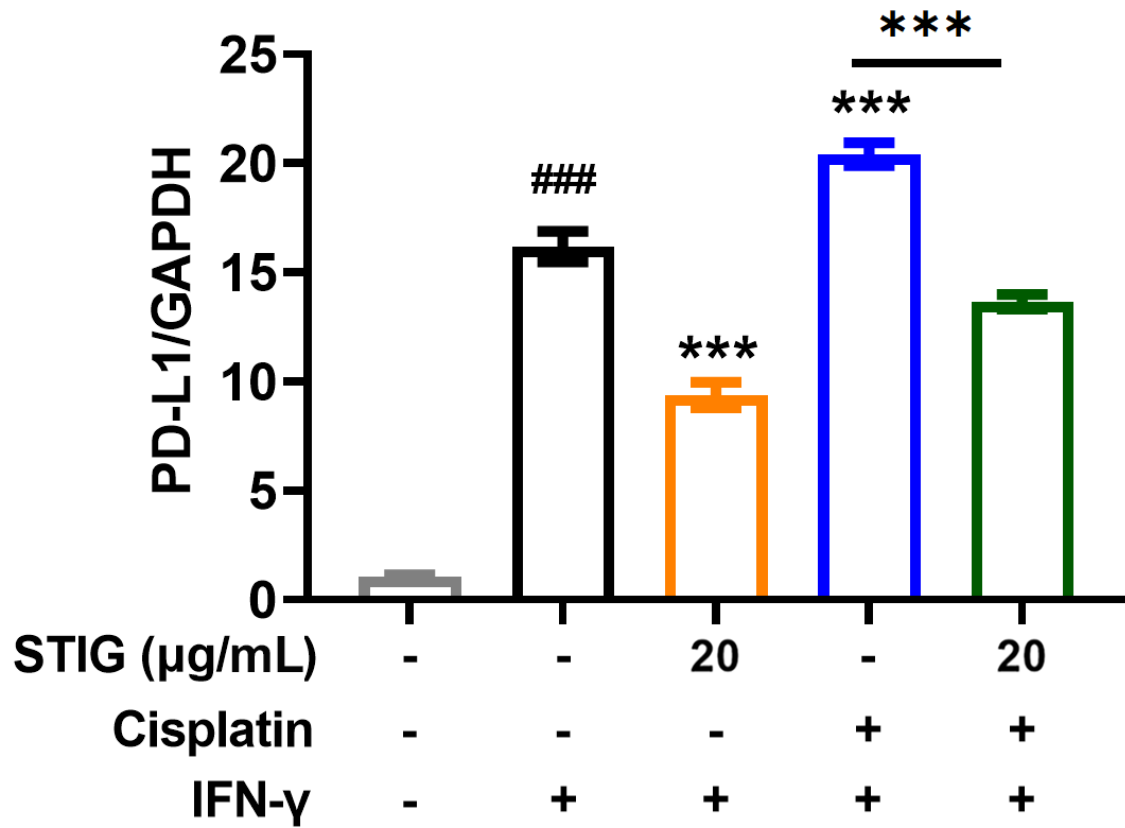

**Figure S4.** The impact of STIG on PD-L1 mRNA levels in A375 cells. The cells treated with STIG or cisplatin were exposed to IFN- $\gamma$  for 24 h. The PD-L1 mRNA level was measured by qPCR.  $###p < 0.001$ , compared with the untreated group (blank).  $***p < 0.001$ , compared with the IFN- $\gamma$ -treated group (control).
